# Supplementary material for: Effect of predatory bacteria on the gut bacterial microbiota in rats
Source: PubMed Central journal article supplement (PMC5337950; doi:10.1038/srep43483), 2017-03-06
Supplement: srep43483-s1.pdf [file srep43483-s1.pdf]

1 Supplemental Information for

2 **Effect of predatory bacteria on the gut bacterial microbiota in rats**

3  
4 Kenneth Shatzkes<sup>1</sup>, Chi Tang<sup>1</sup>, Eric Singleton<sup>1</sup>, Sean Shukla<sup>1</sup>, Michael Zuena<sup>1</sup>, Shilpi Gupta<sup>2</sup>,  
5 Sonal Dharani<sup>2</sup>, Joseph Rinaggio<sup>3</sup>, Nancy D. Connell<sup>1</sup>, and Daniel E. Kadouri<sup>2\*</sup>

6  
7 <sup>1</sup> Division of Infectious Disease, Department of Medicine, Rutgers New Jersey Medical School,  
8 Newark, NJ 07103, USA

9 <sup>2</sup> Department of Oral Biology, Rutgers School of Dental Medicine, Newark, NJ 07103, USA

10 <sup>3</sup> Department of Diagnostic Sciences, Rutgers School of Dental Medicine, Newark, NJ 07103,  
11 USA

12  
13 \* Address correspondence to Daniel E. Kadouri, [kadourde@sdm.rutgers.edu](mailto:kadourde@sdm.rutgers.edu)

14

15

16

17

18

19

20

21

22

23

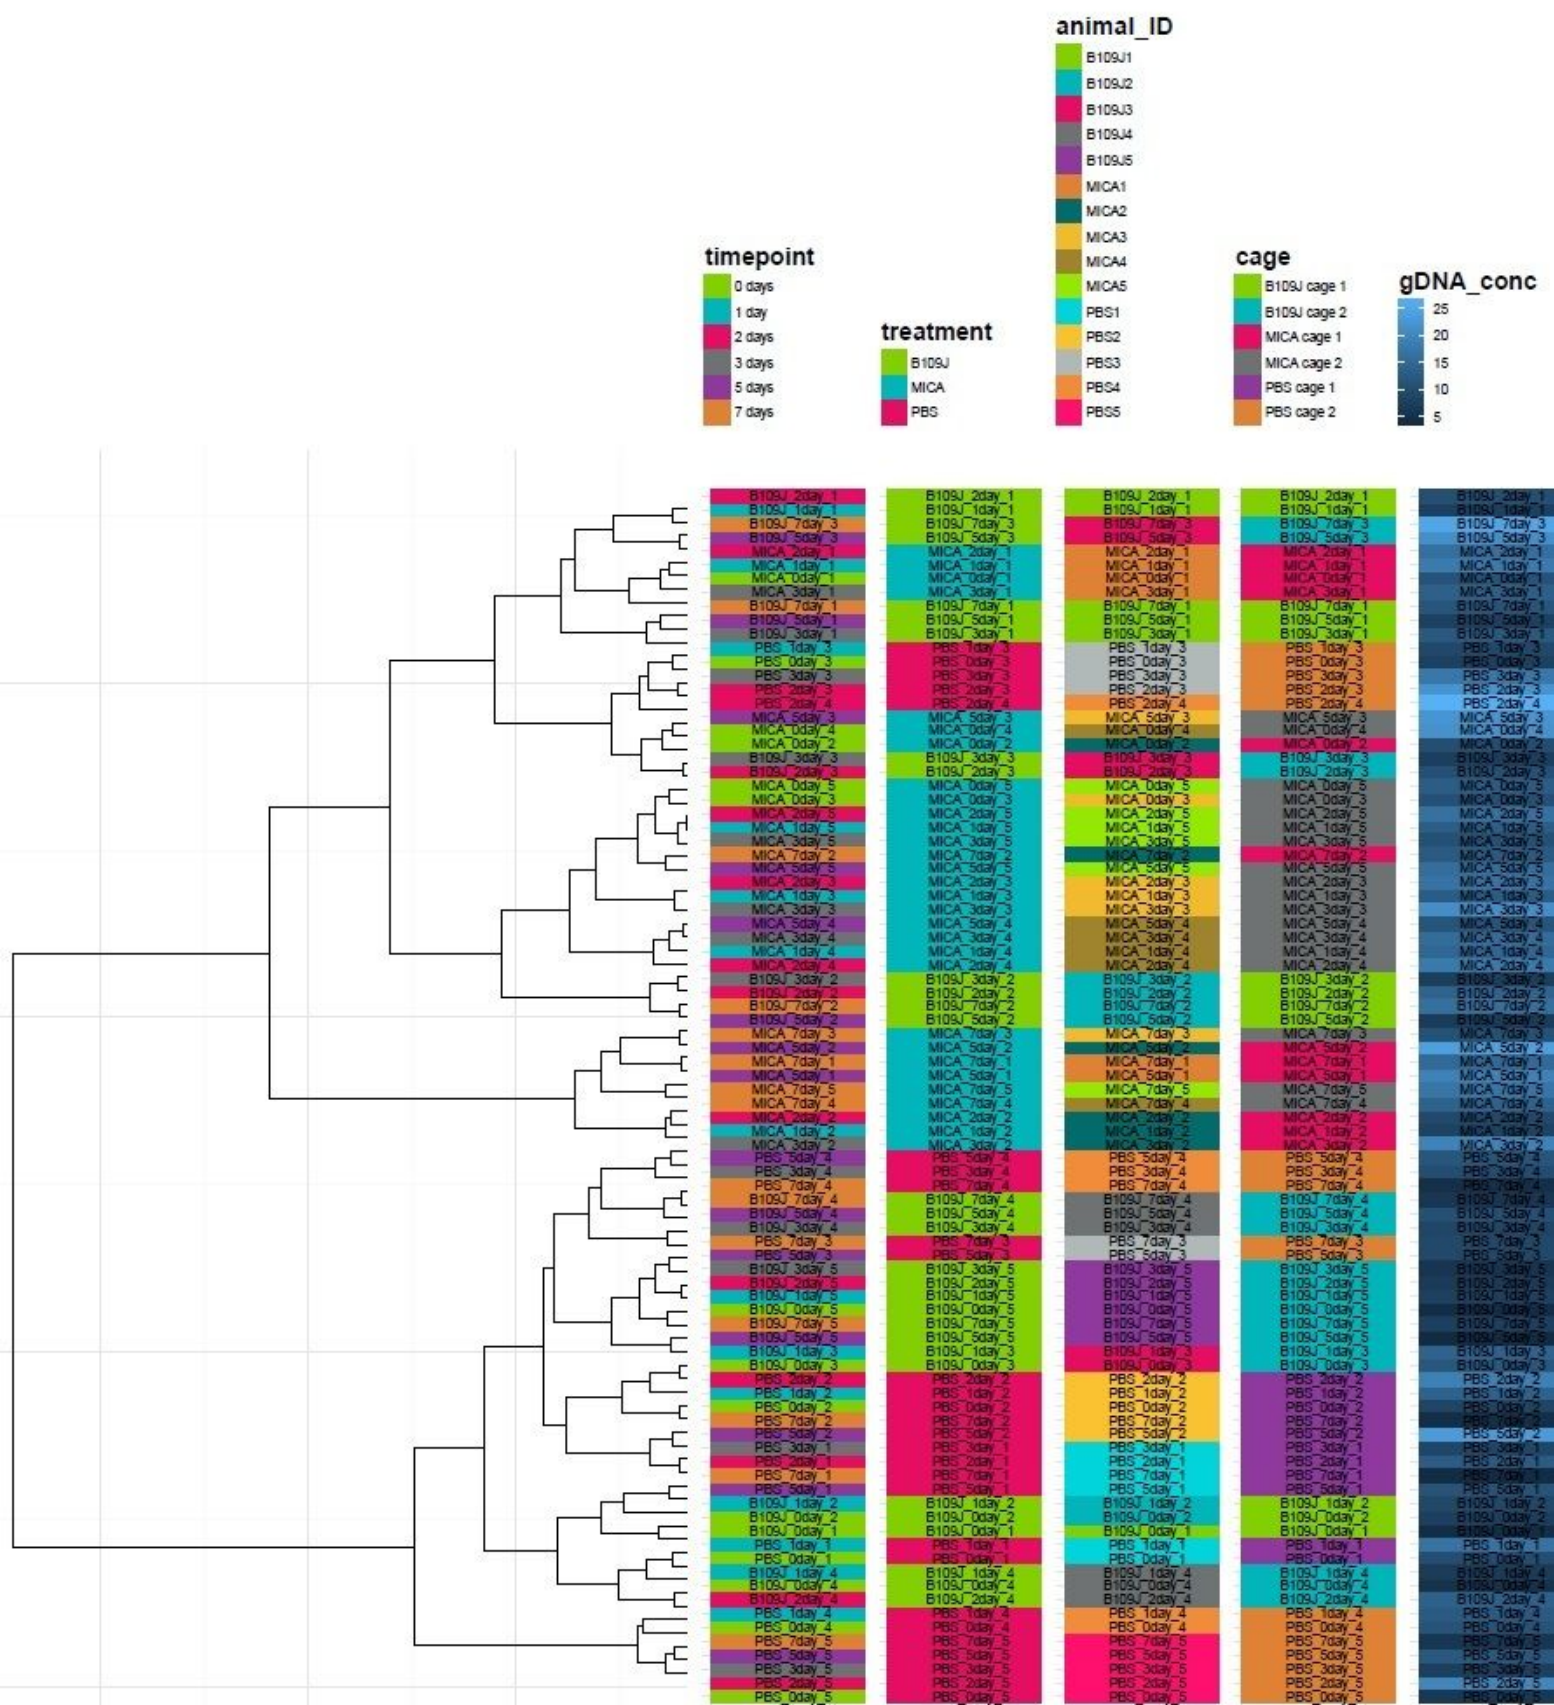

### Supplementary Figure S1

**Hierarchical clustering of all microbiota samples.** Dendrogram of all microbiota samples extracted from feces of rats intrarectally inoculated with PBS, *B. bacteriovorus* (109J), or *M. aeruginosavorus* (MICA). Dendrograms were created using the Ward 2 method. Samples clustered by treatment, cage number, and animal ID. Sample name format is: Treatment\_DayFecesCollected\_AnimalID.

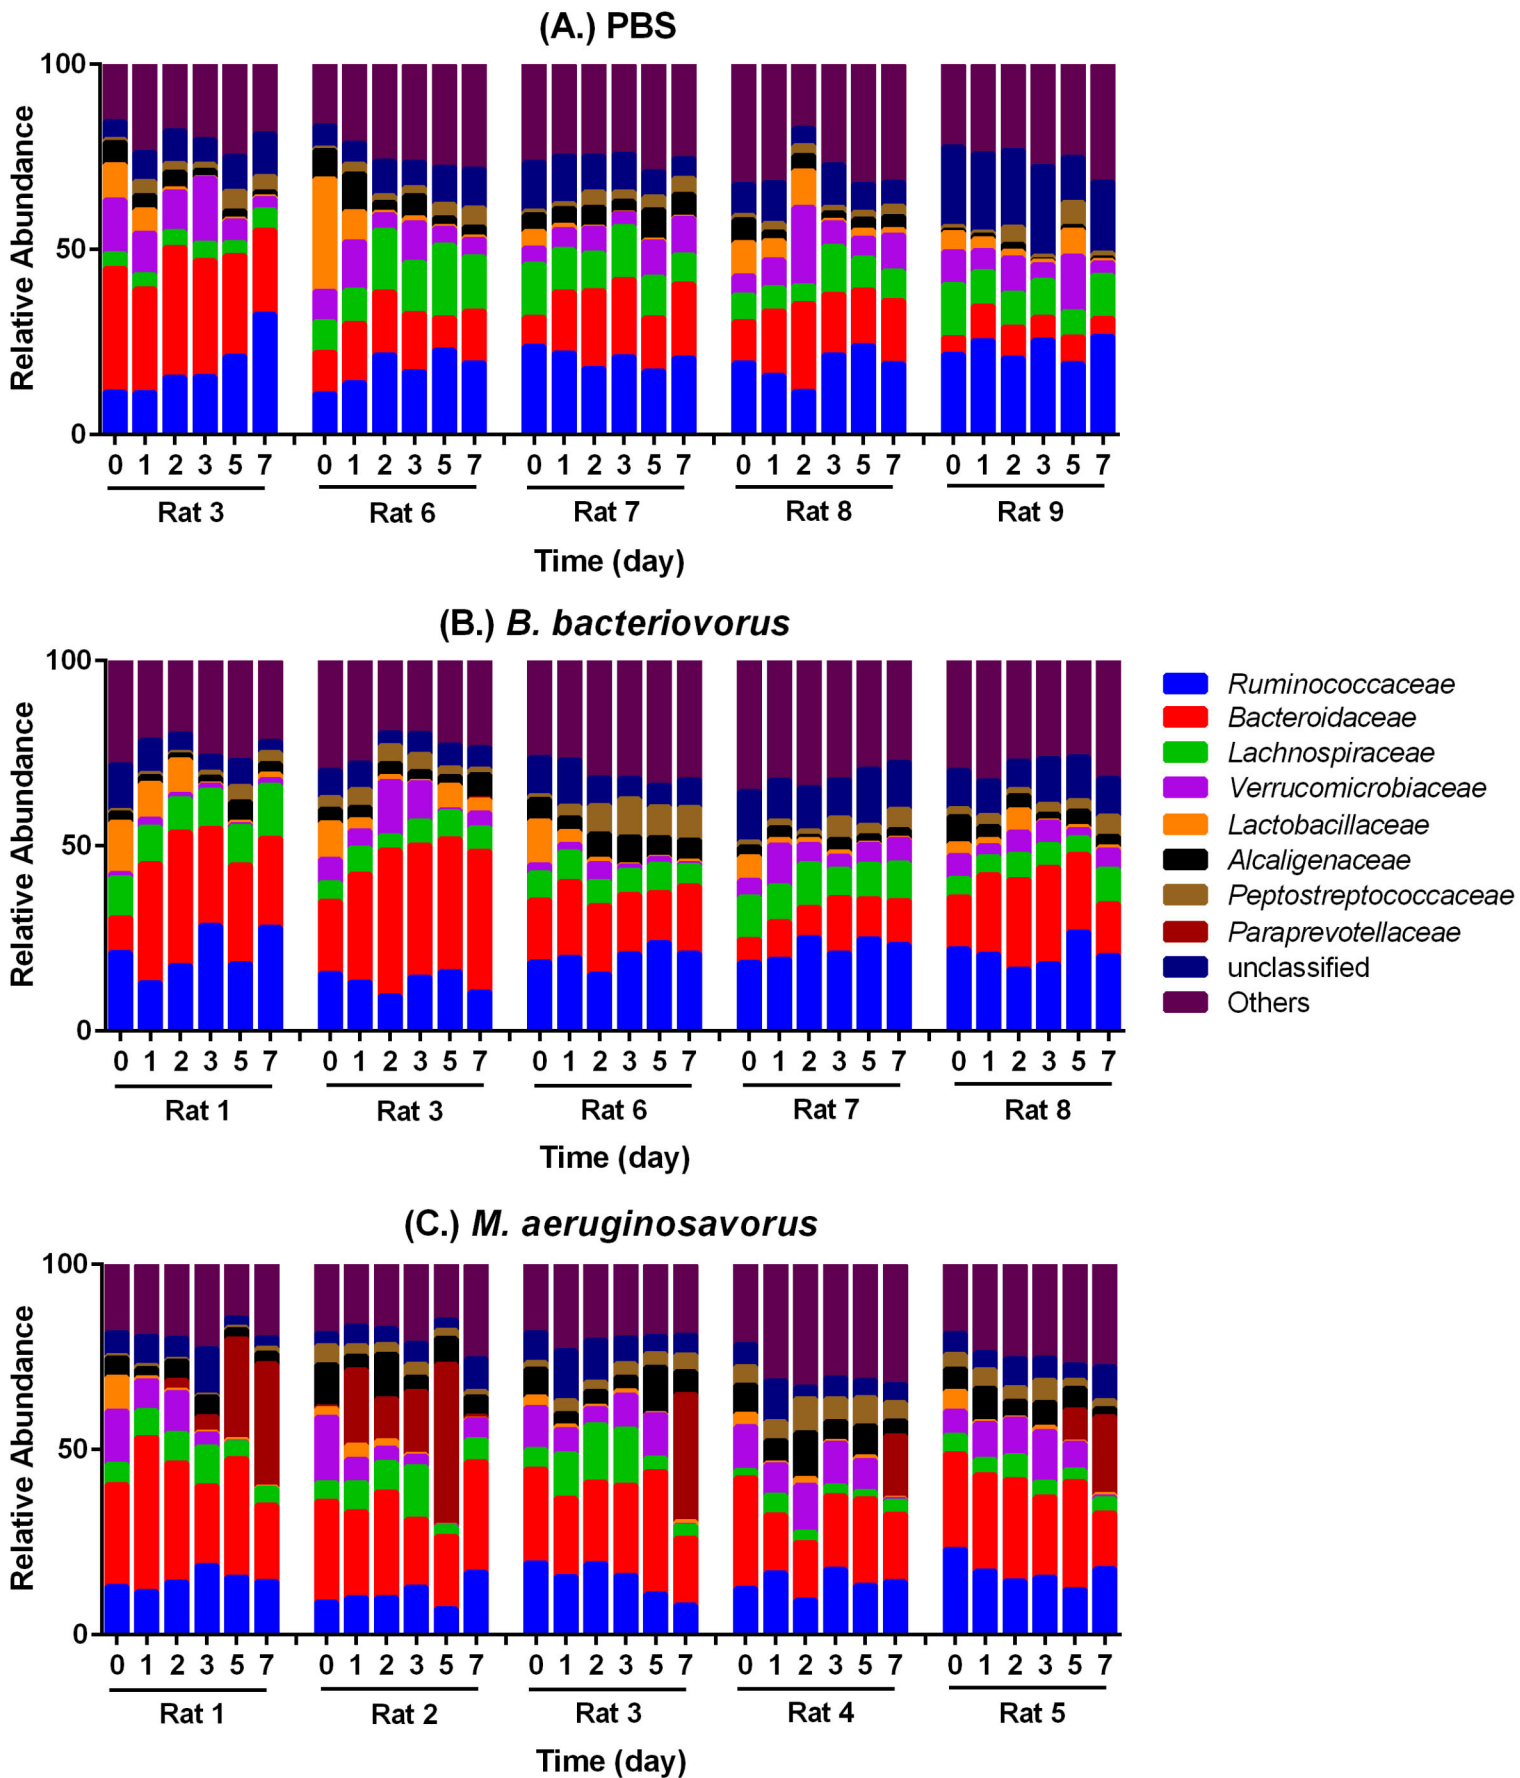

**Supplementary Figure S2**

**Proportional family taxa abundance over time.** Relative abundances of most abundant microbial populations at family level in feces collected from all rats intrarectally inoculated with (A) PBS, (B) *B. bacteriovorus* or (C) *M. aeruginosavorus* over seven days.

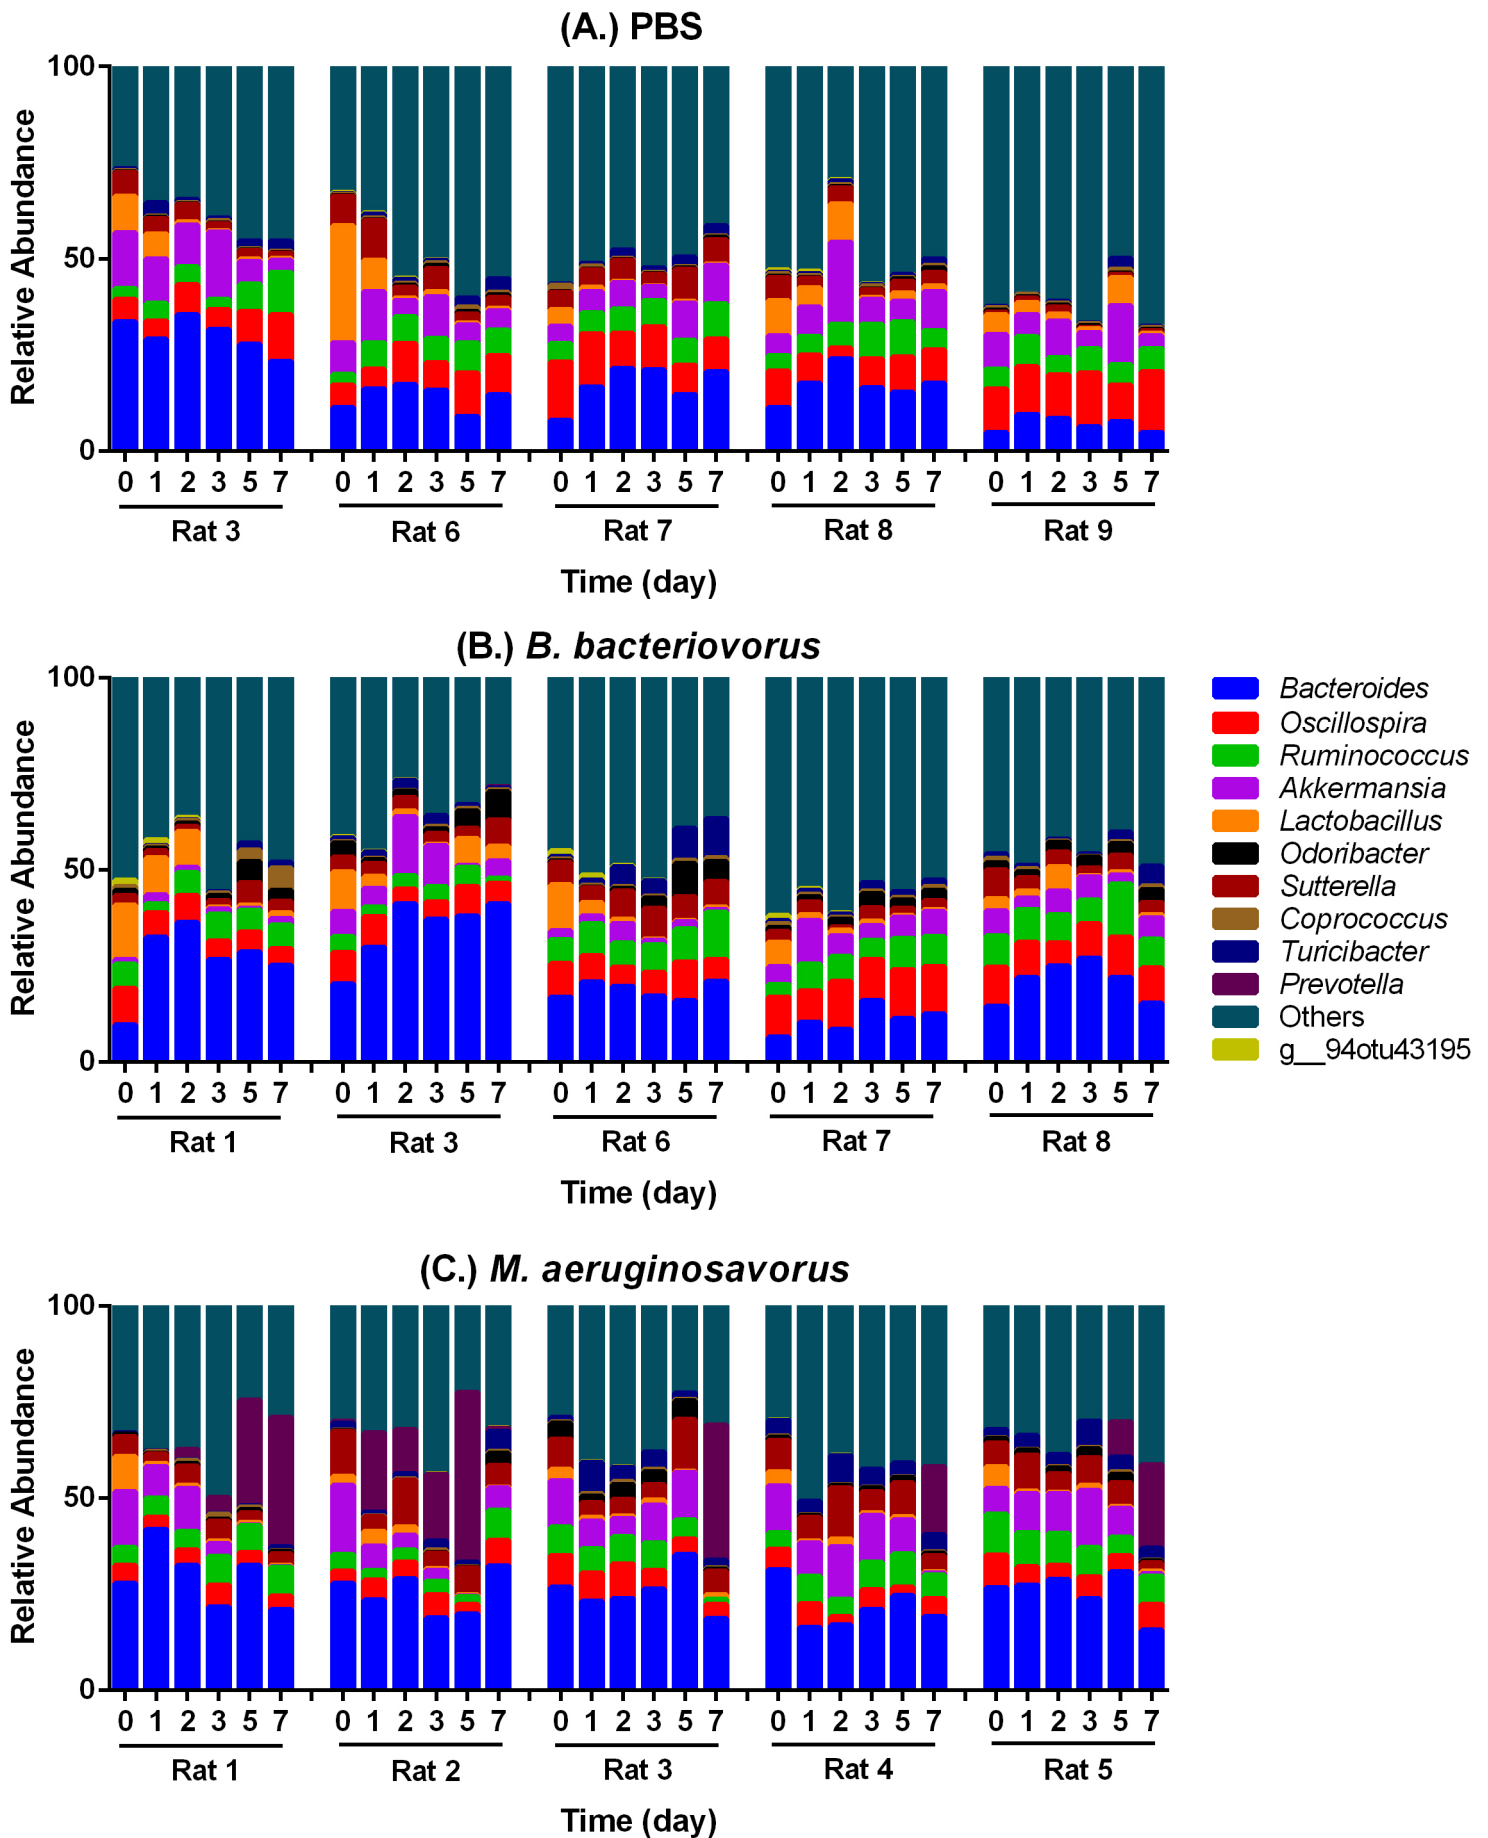

**Supplementary Figure S3**

**Proportional genus taxa abundance over time.** Relative abundances of most abundant microbial populations at genus level in feces collected from all rats intrarectally inoculated with (A) PBS, (B) *B. bacteriovorus* or (C) *M. aeruginosavorus* over seven days.

(A.) PBS

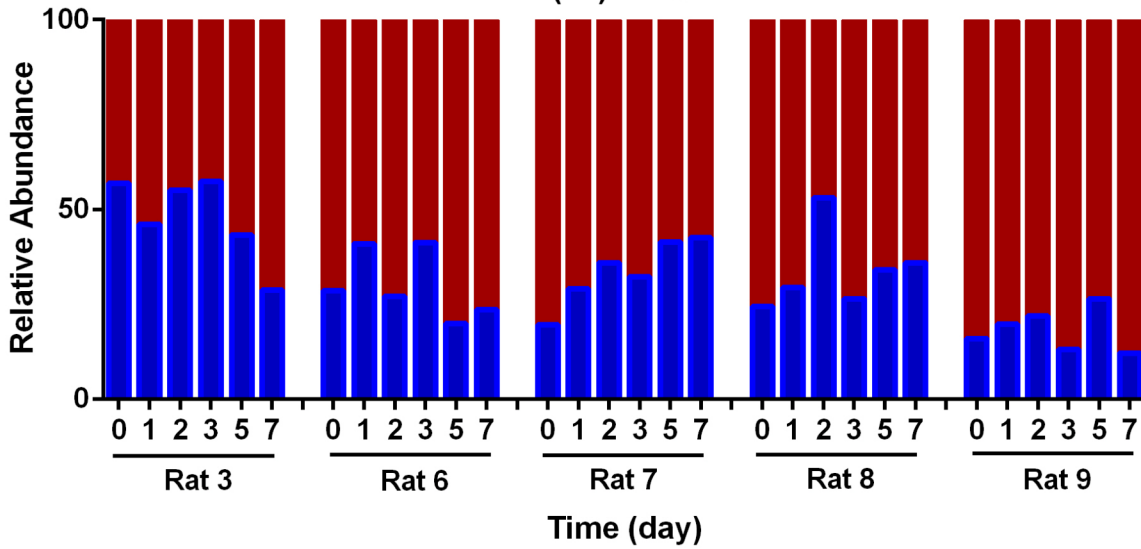

(B.) *B. bacteriovorus*

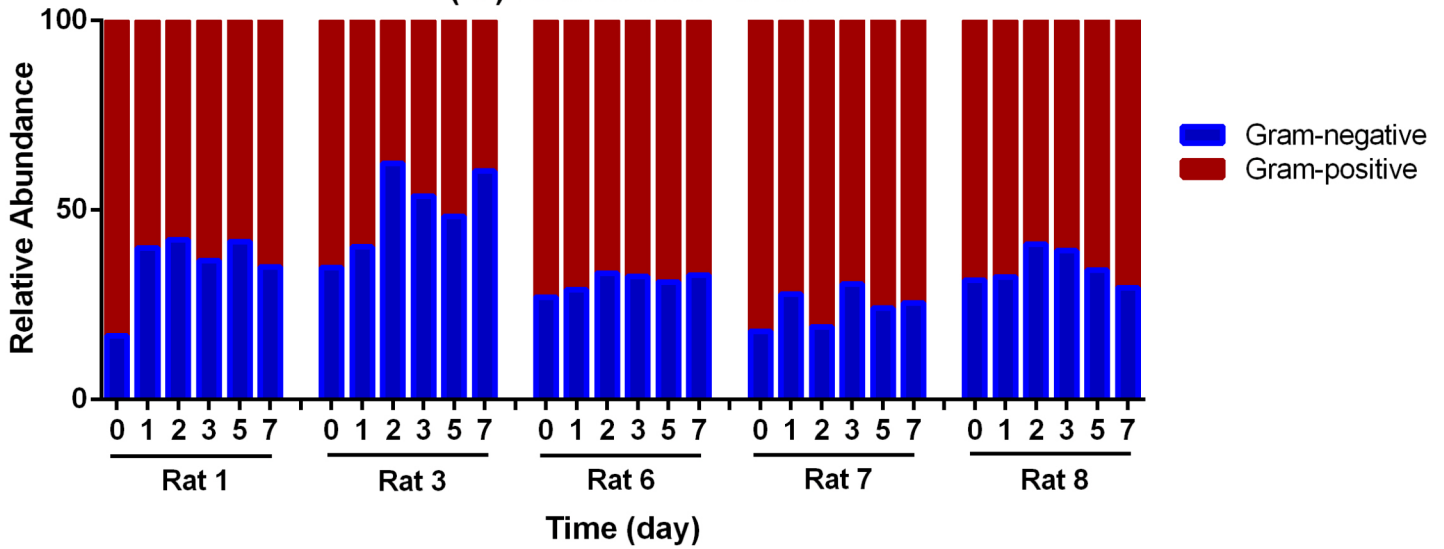

(C.) *M. aeruginosavorus*

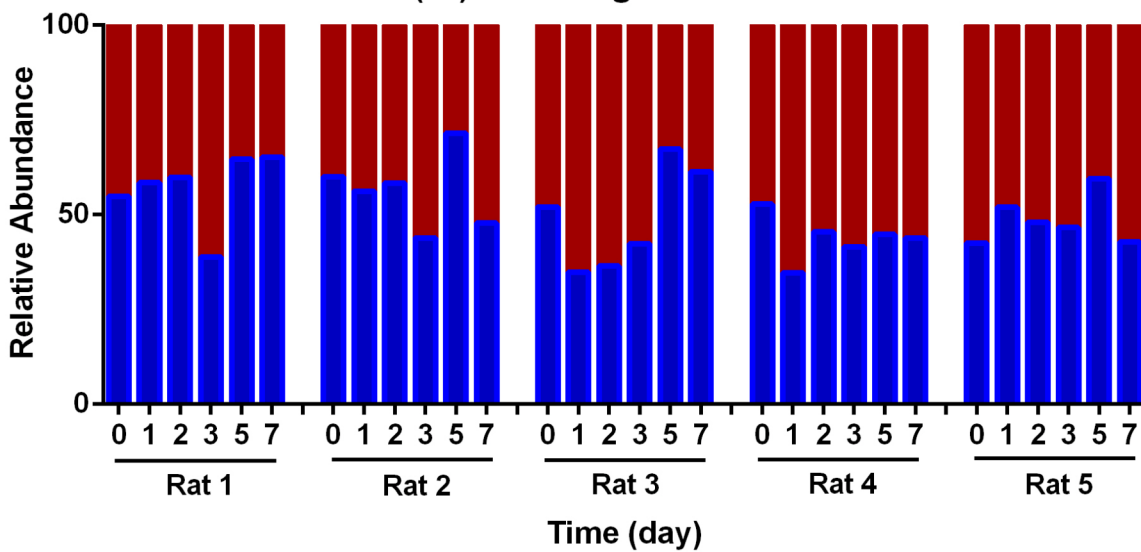

Supplementary Figure S4

Proportional abundance by Gram-status over time. Relative abundances by Gram-status in feces collected from all rats intrarectally inoculated with (A) PBS, (B) *B. bacteriovorus* or (C) *M. aeruginosavorus* over seven days.

**(A.) PBS**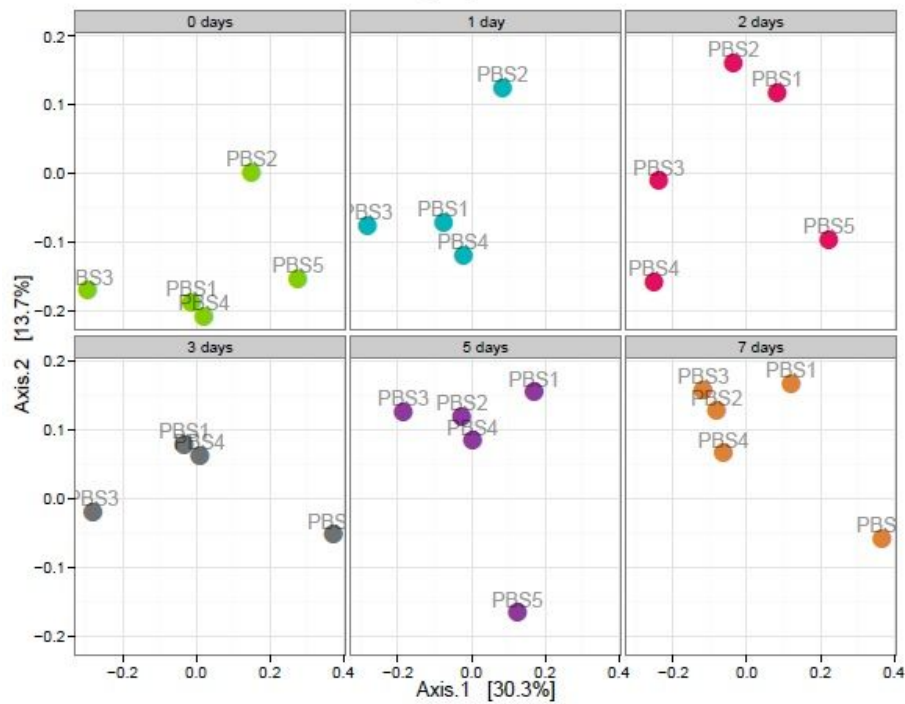**(B.) *B. bacteriovorus* 109J**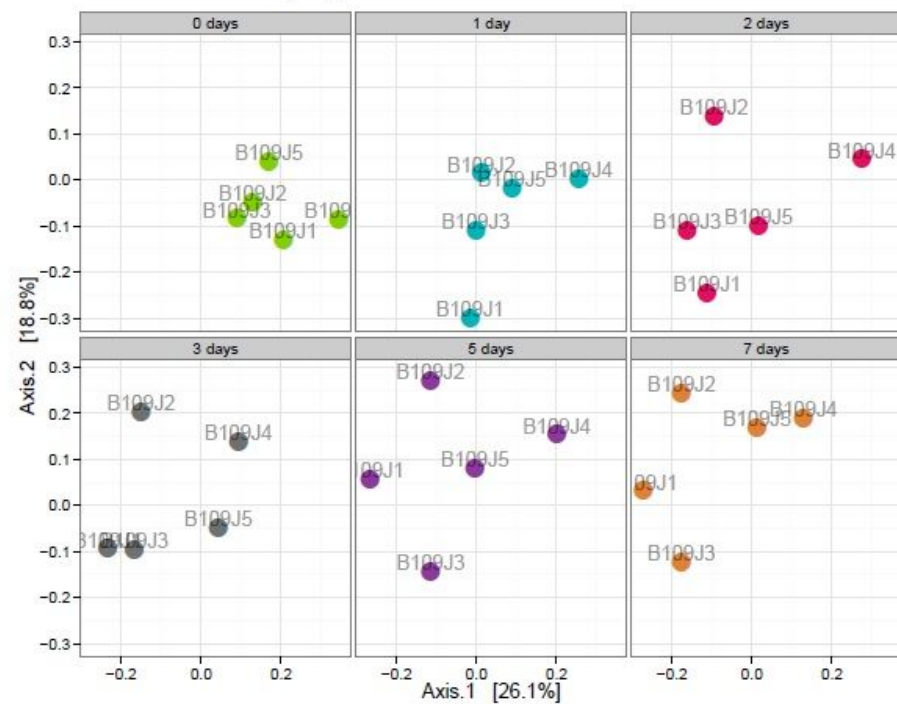**(C.) *M. aeruginosavorus***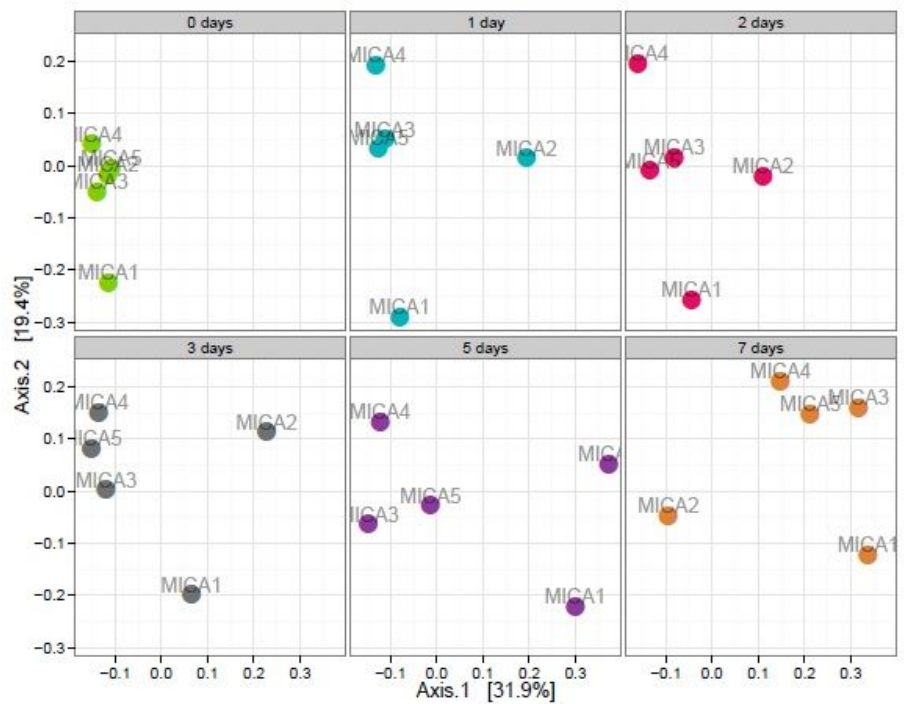**timepoint**

- 0 days
- 1 day
- 2 days
- 3 days
- 5 days
- 7 days

**Supplementary Figure S5**

**Weighted ordination analysis of microbiota samples by treatment over time.** Dimensional reduction of the Bray-Curtis distance between samples tested from feces collected from rats intrarectally inoculated with (A) PBS, (B) *B. bacteriovorus* (B109J) or (C) *M. aeruginosavorus* (MICA) over seven days, using the principal coordinate analysis (PCoA) ordination method.

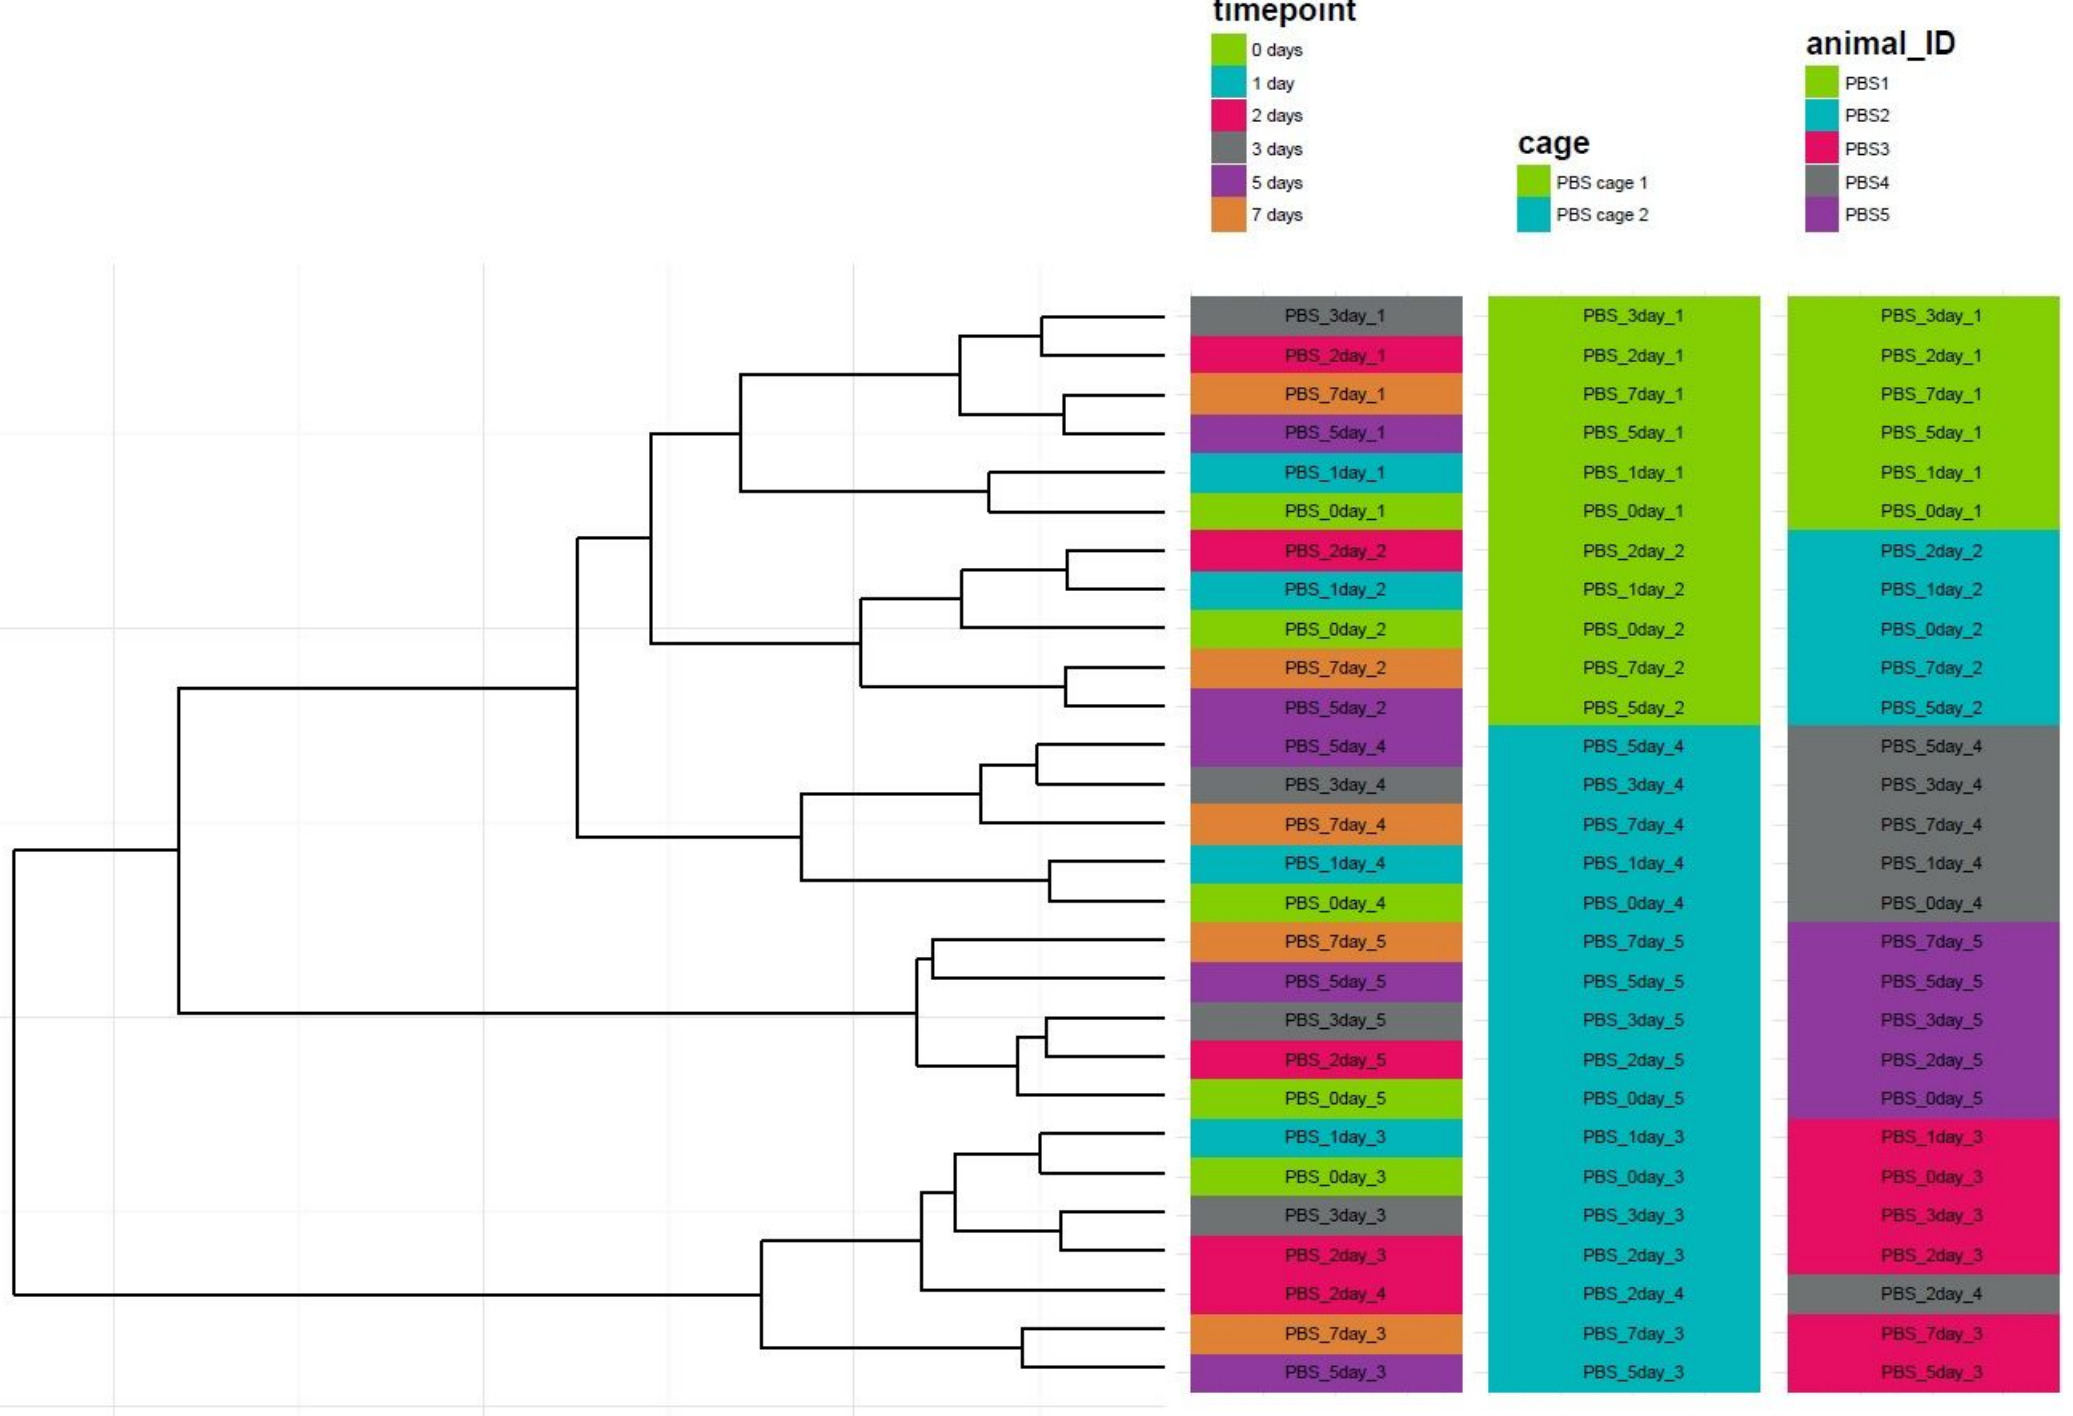

**Supplementary Figure S6**

**Hierarchical clustering of PBS-treated samples over time.** Dendrogram of all microbiota samples extracted from feces of rats intrarectally inoculated with PBS over seven days. Dendrograms were created using the Ward 2 method. Samples clustered by cage number and animal ID. Sample name format is: Treatment\_DayFecesCollected\_AnimalID.

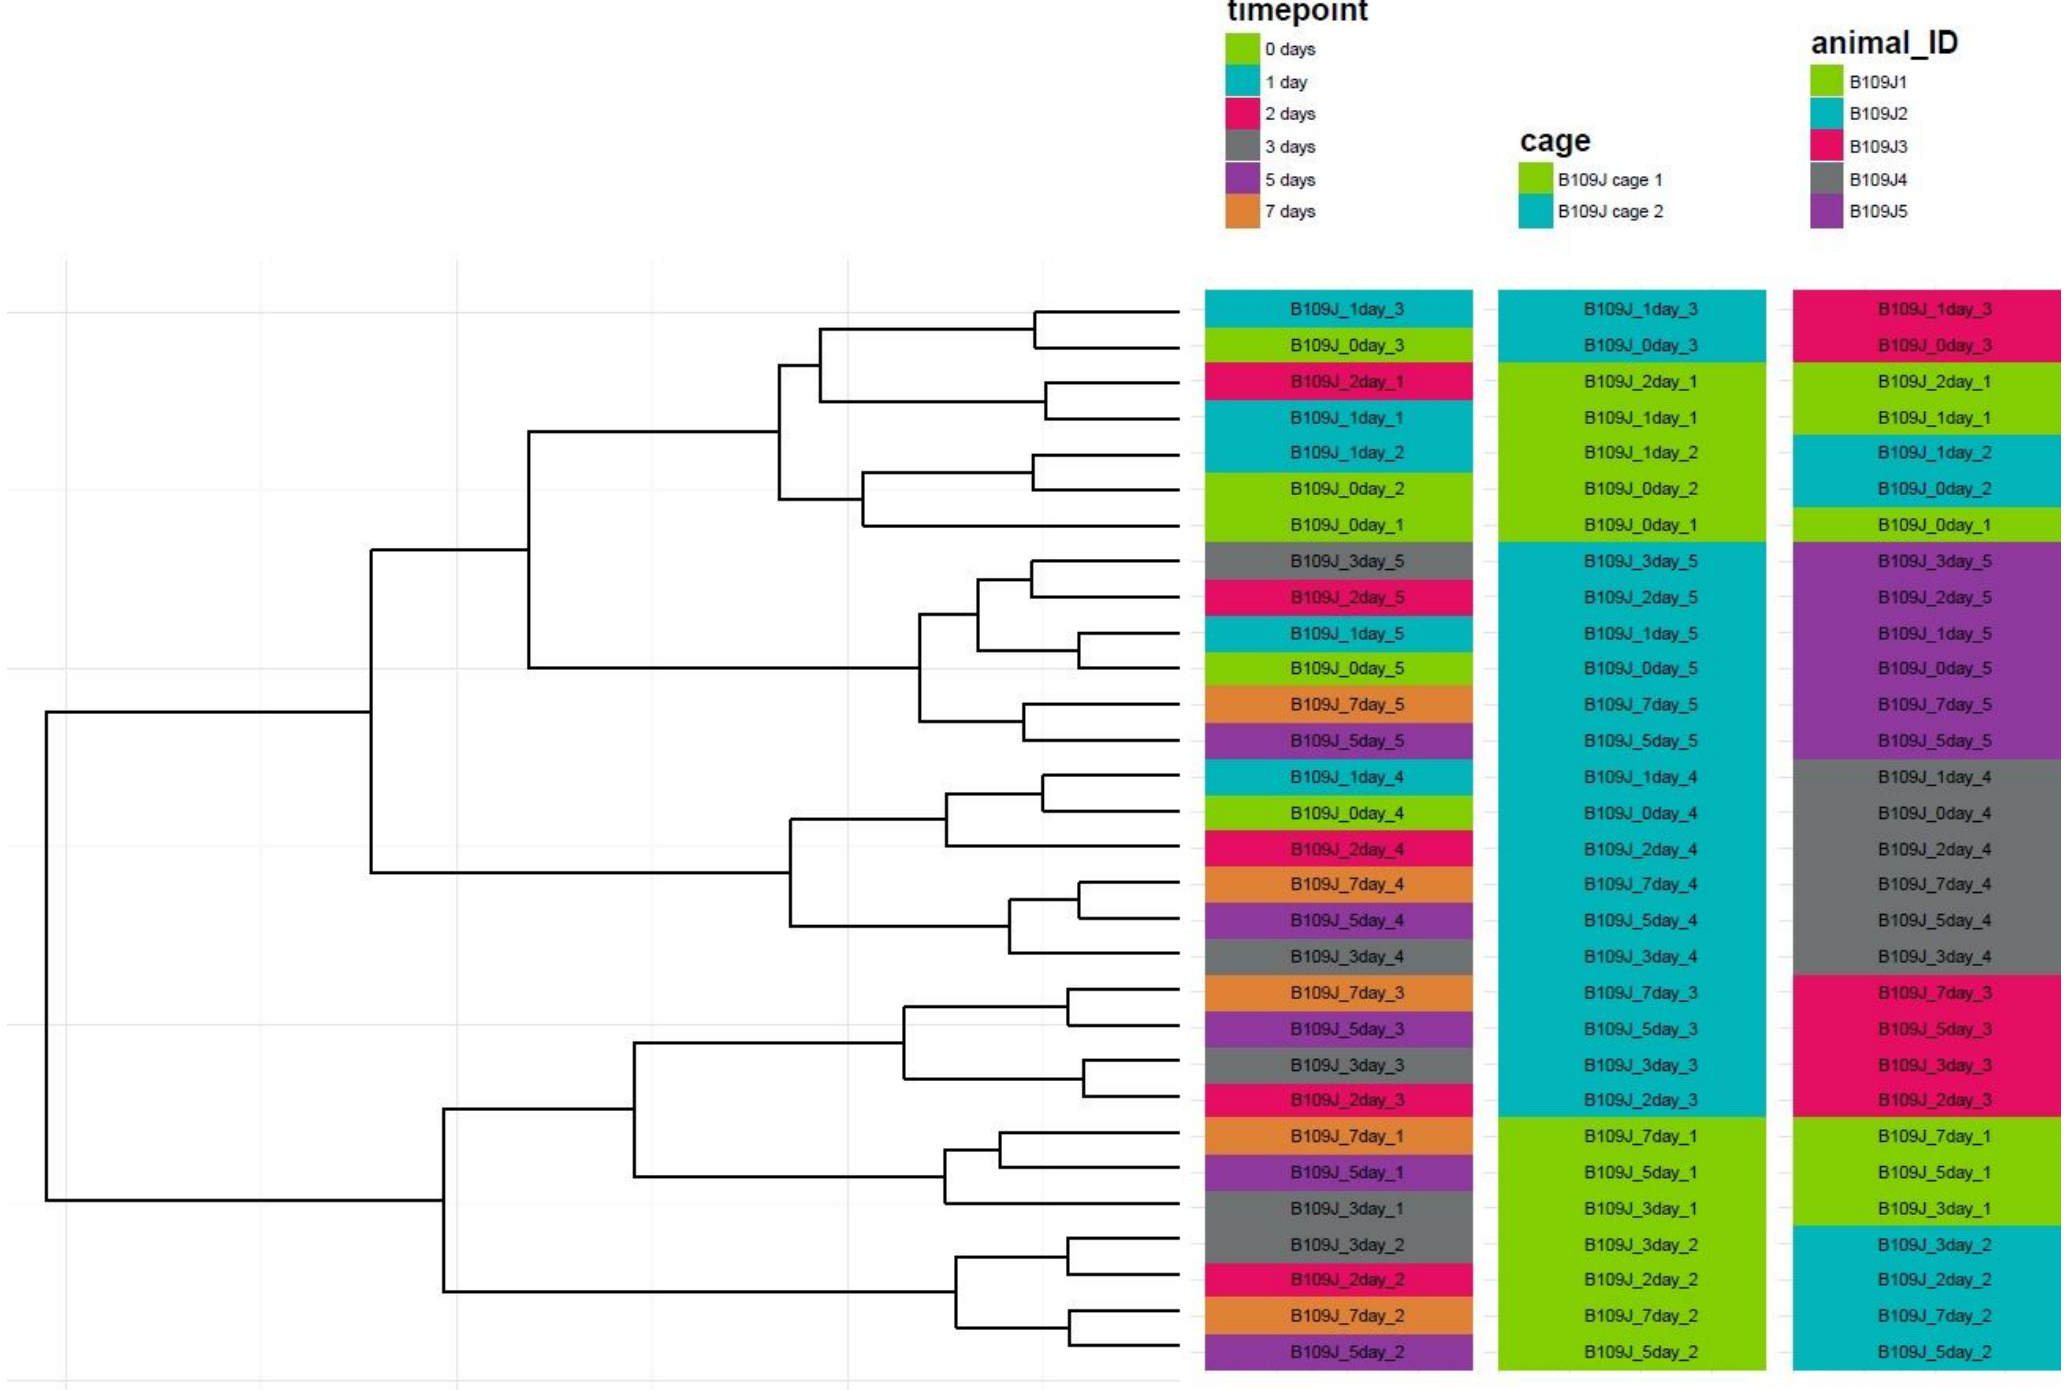

**Supplementary Figure S7**

**Hierarchical clustering of *B. bacteriovorus*-treated samples over time.** Dendrogram of all microbiota samples extracted from feces of rats intrarectally inoculated with *B. bacteriovorus* 109J (B109J) over seven days. Dendrograms were created using the Ward 2 method. Samples formed two main clusters by time point (1<sup>st</sup> cluster at earlier time points 0-2 days, 2<sup>nd</sup> cluster at 3-7 days). Samples further sub-clustered according to cage and animal ID. Sample name format is: Treatment\_DayFecesCollected\_AnimalID.



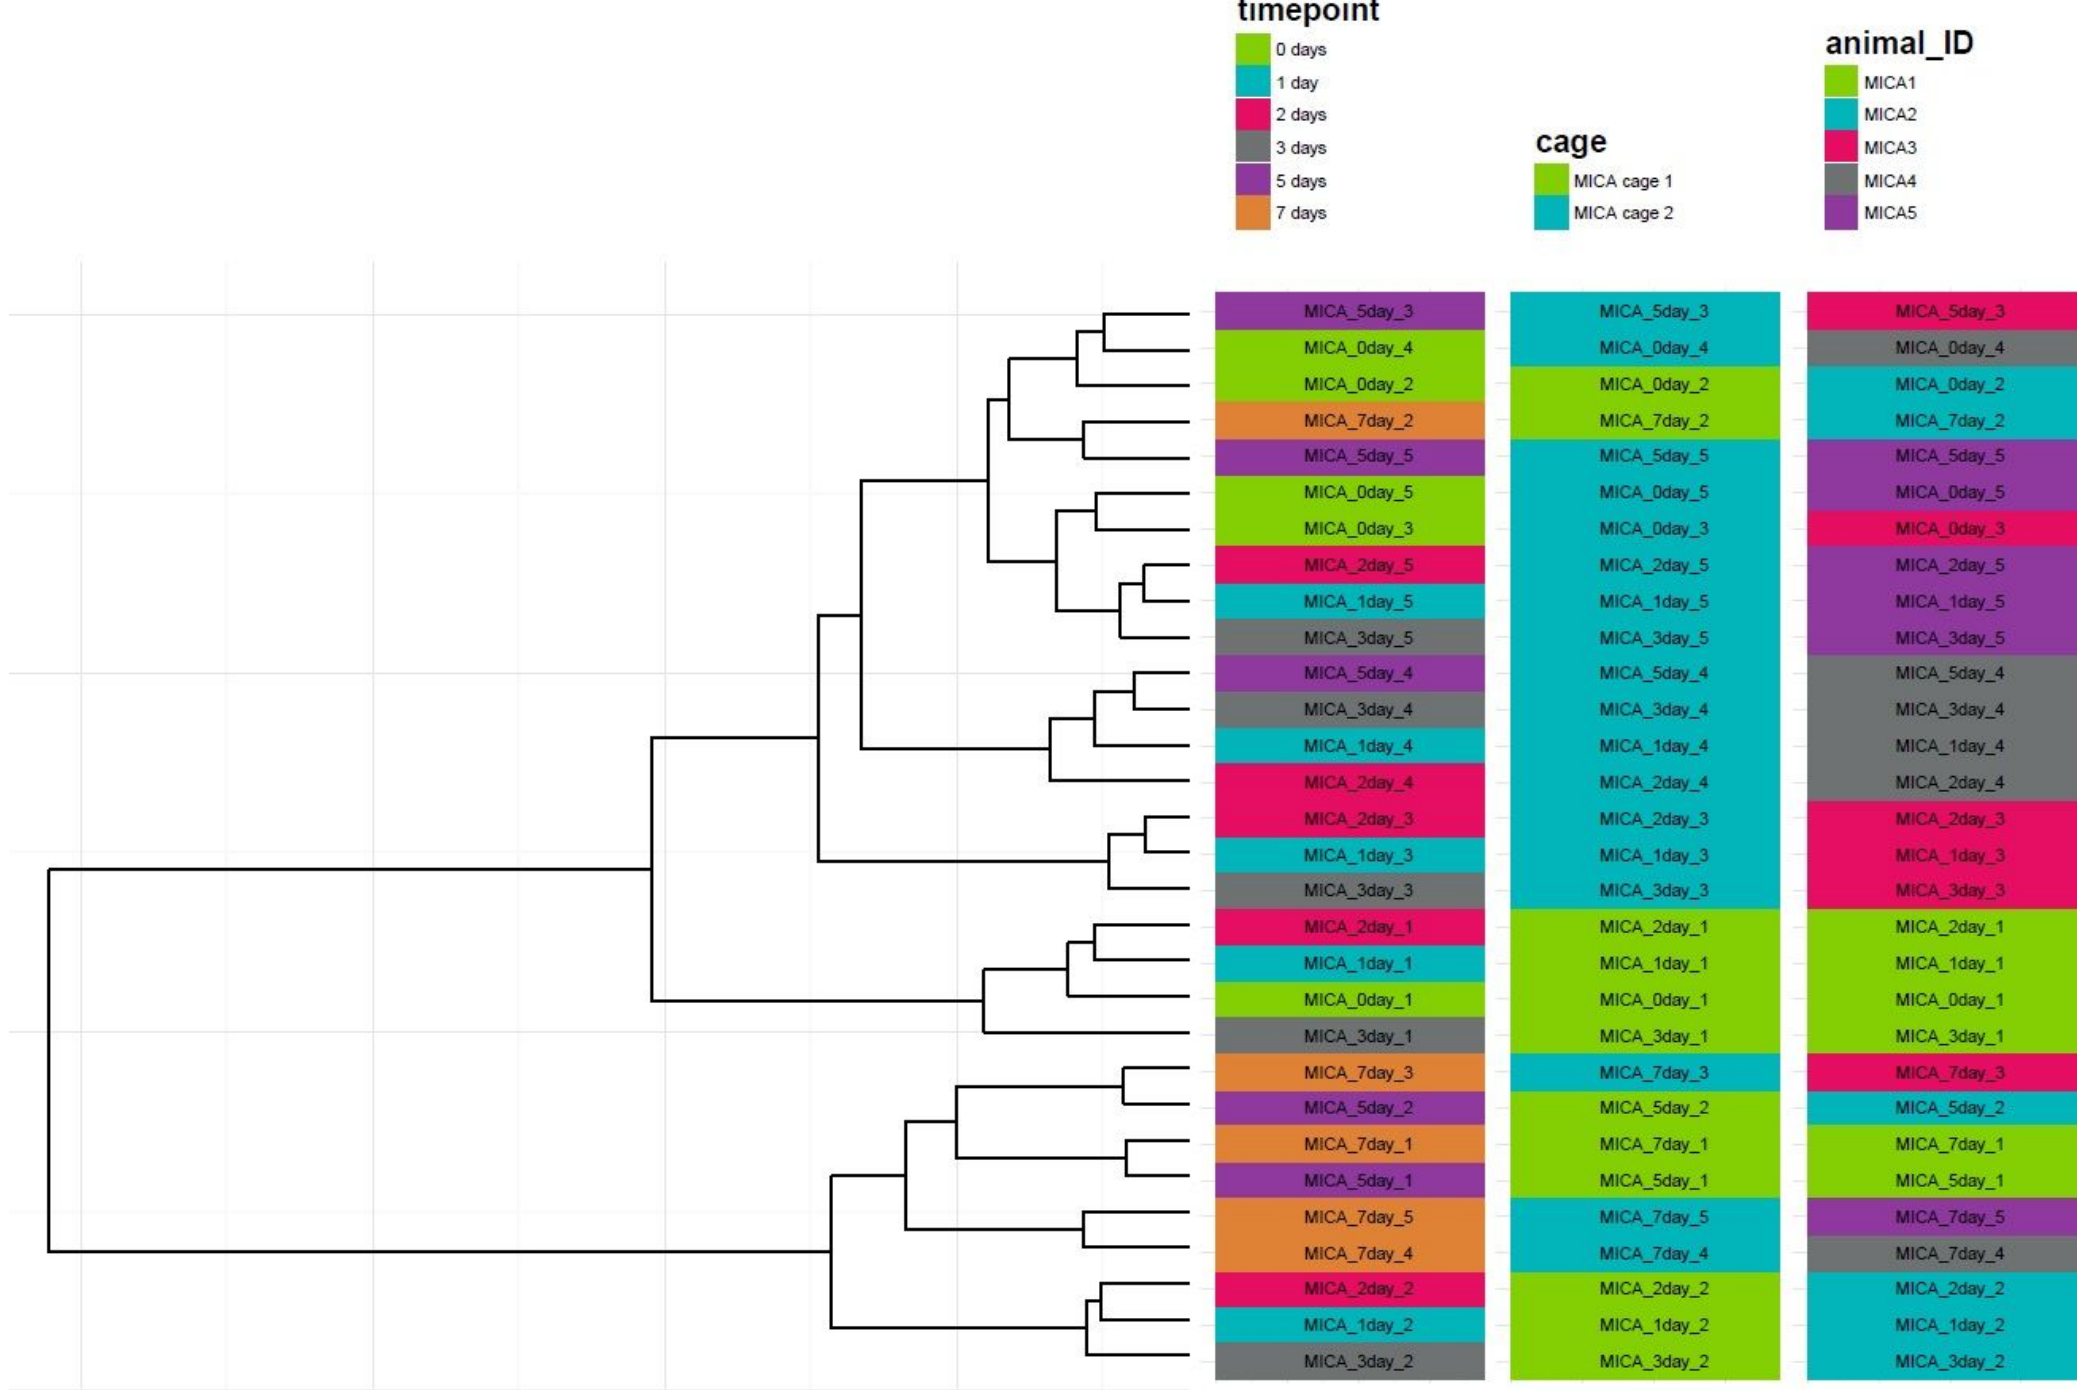

### Supplementary Figure S8

**Hierarchical clustering of *M. aeruginosavorus*-treated samples over time.** Dendrogram of all microbiota samples extracted from feces of rats intrarectally inoculated with *M. aeruginosavorus* (MICA) over seven days. Dendrograms were created using the Ward 2 method. Clustering patterns appeared to be driven by animal ID. Sample name format is: Treatment\_DayFecesCollected\_AnimalID.

(A.) *B. bacteriovorus* vs. PBS

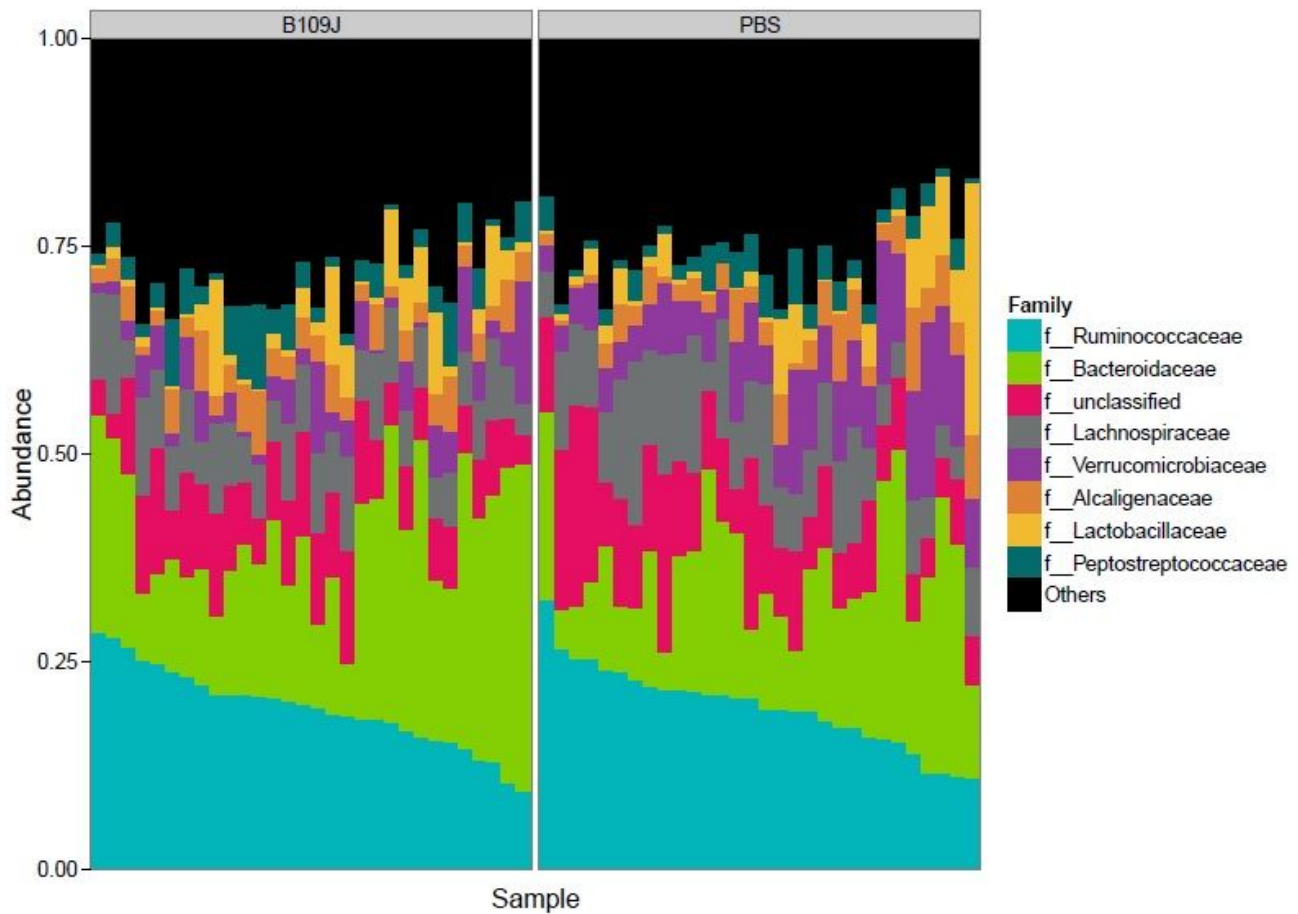

(B.) *M. aeruginosavorus* vs. PBS

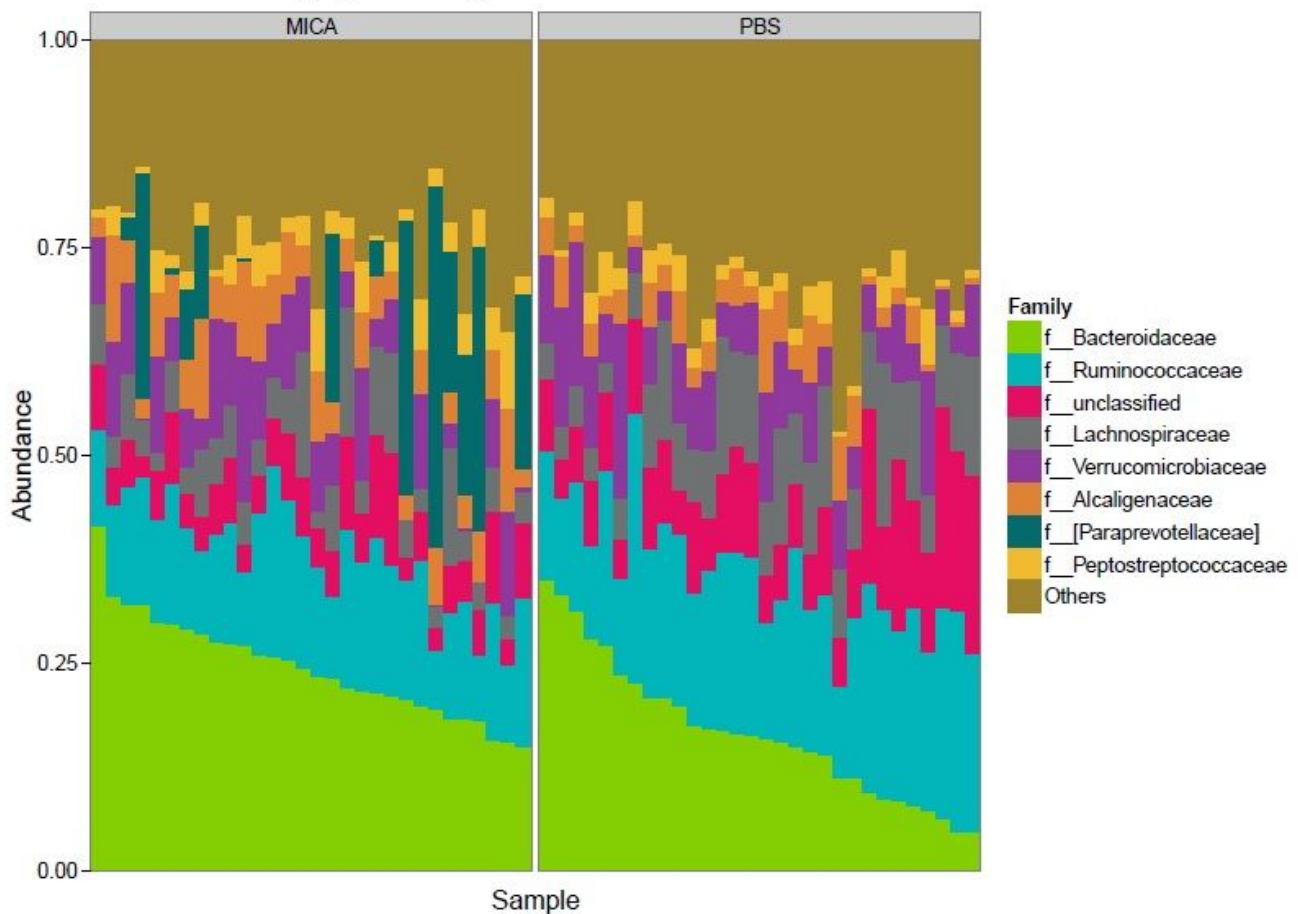

**Supplementary Figure S9**

**Proportional abundance relative to PBS control.** Relative abundances of most abundant microbial populations by family in all feces collected from rats intrarectally inoculated with (A) *B. bacteriovorus* (B109J) or (B) *M. aeruginosavorus* (MICA) compared to PBS. Plots show the most abundant taxa at the Family level.

**(A.) *B. bacteriovorus* vs. PBS**

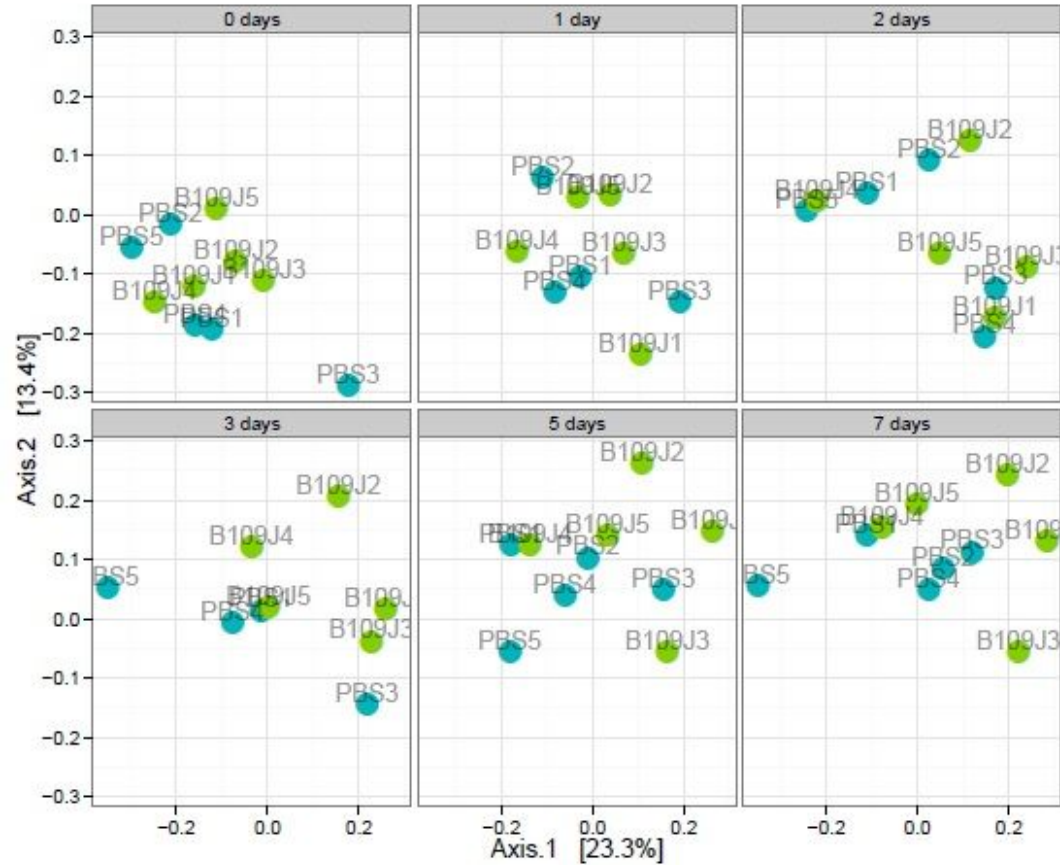

**(B.) *M. aeruginosavorus* vs. PBS**

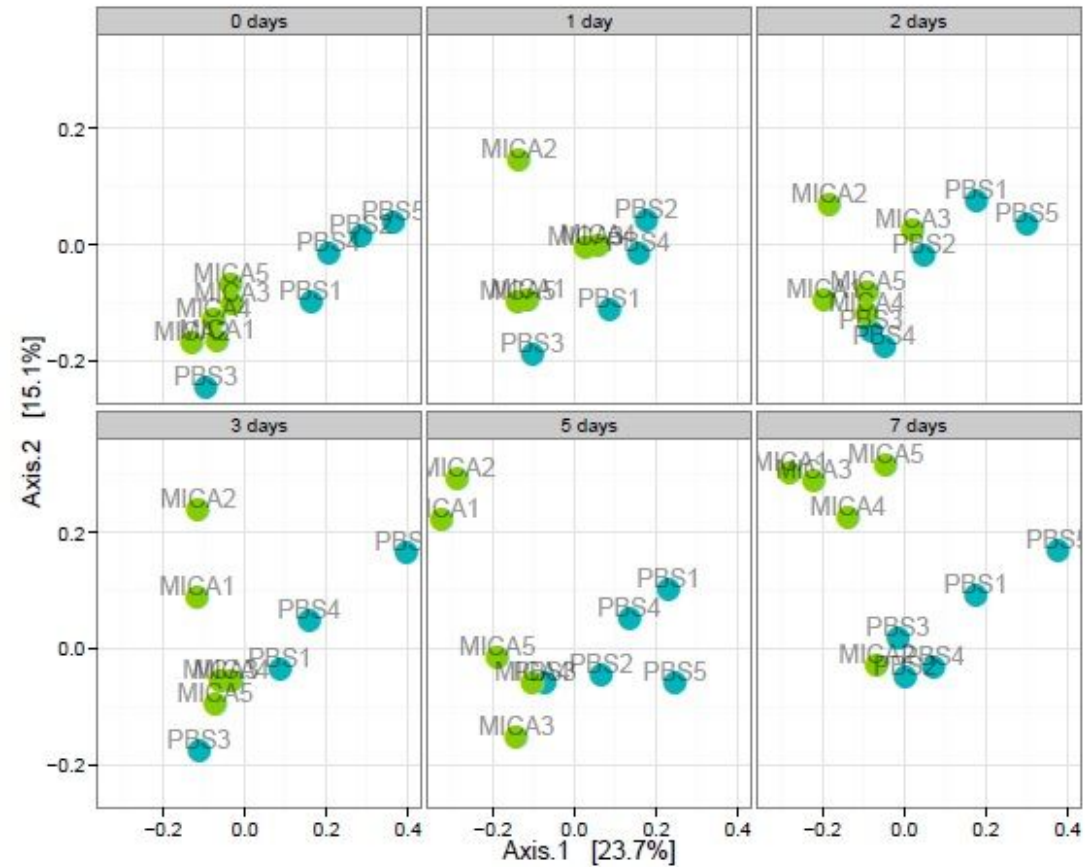

**Supplementary Figure S10**

**Weighted ordination analysis using abundance of predatory bacteria-treated samples vs. PBS control.** Dimensional reduction of the Bray-Curtis distance between samples tested from feces collected from rats intrarectally inoculated with (A) *B. bacteriovorus* (B109J) vs. PBS, or (B) *M. aeruginosavorus* (MICA) vs. PBS over seven days, using the principal coordinate analysis (PCoA) ordination method.

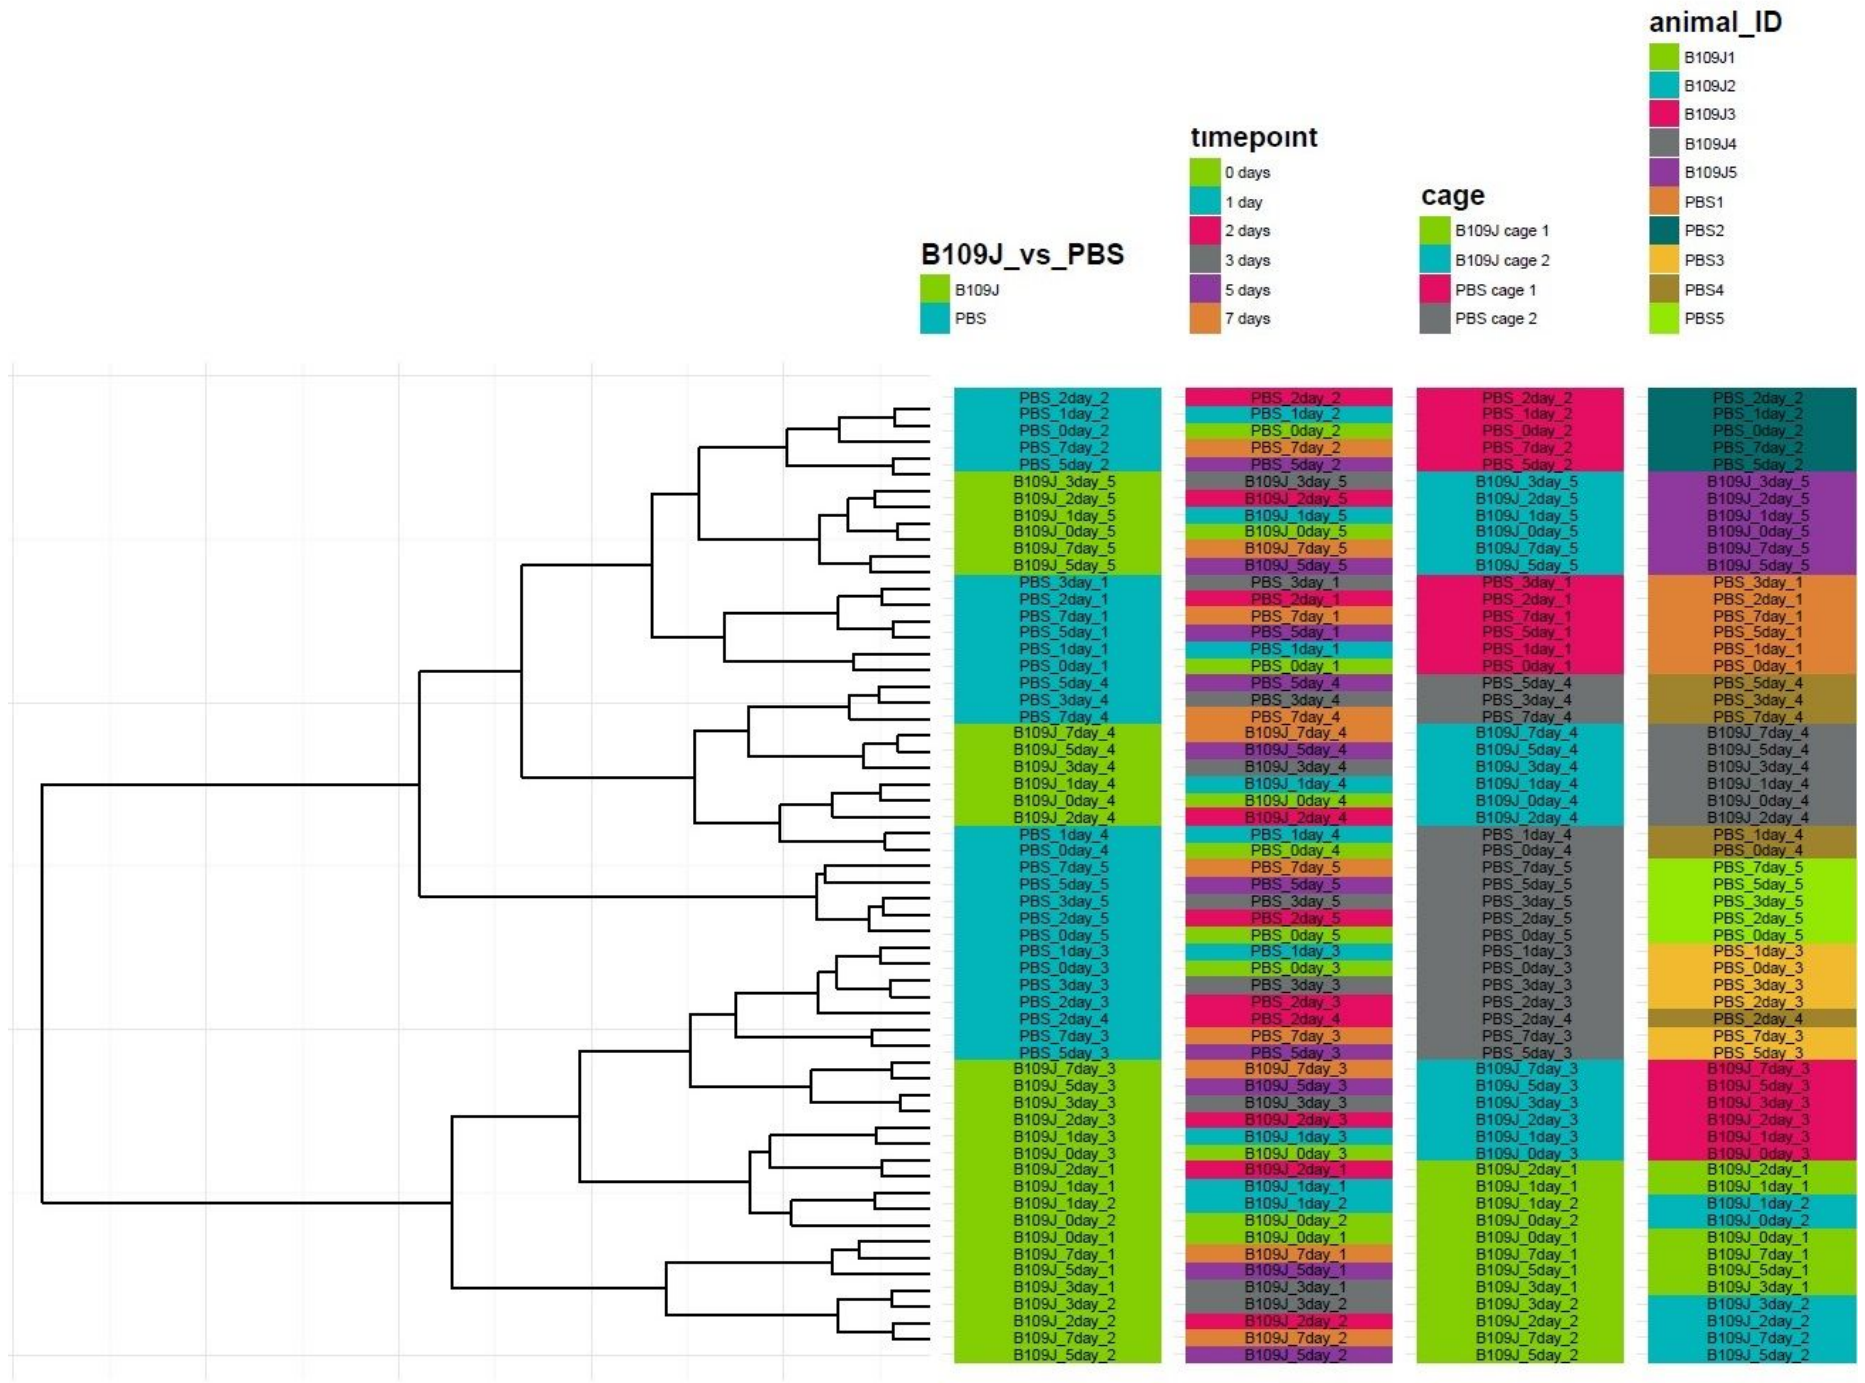

**Supplementary Figure S11**

**Hierarchical clustering of *B. bacteriovorus*-treated samples vs. PBS control.** Dendrogram of microbiota samples extracted from feces of rats intrarectally inoculated with *B. bacteriovorus* 109J (B109J) vs. PBS over seven days. Dendrograms were created using the Ward 2 method. Samples clustered by animal ID, cage number, and treatment group. Sample name format is: Treatment\_DayFecesCollected\_AnimalID.

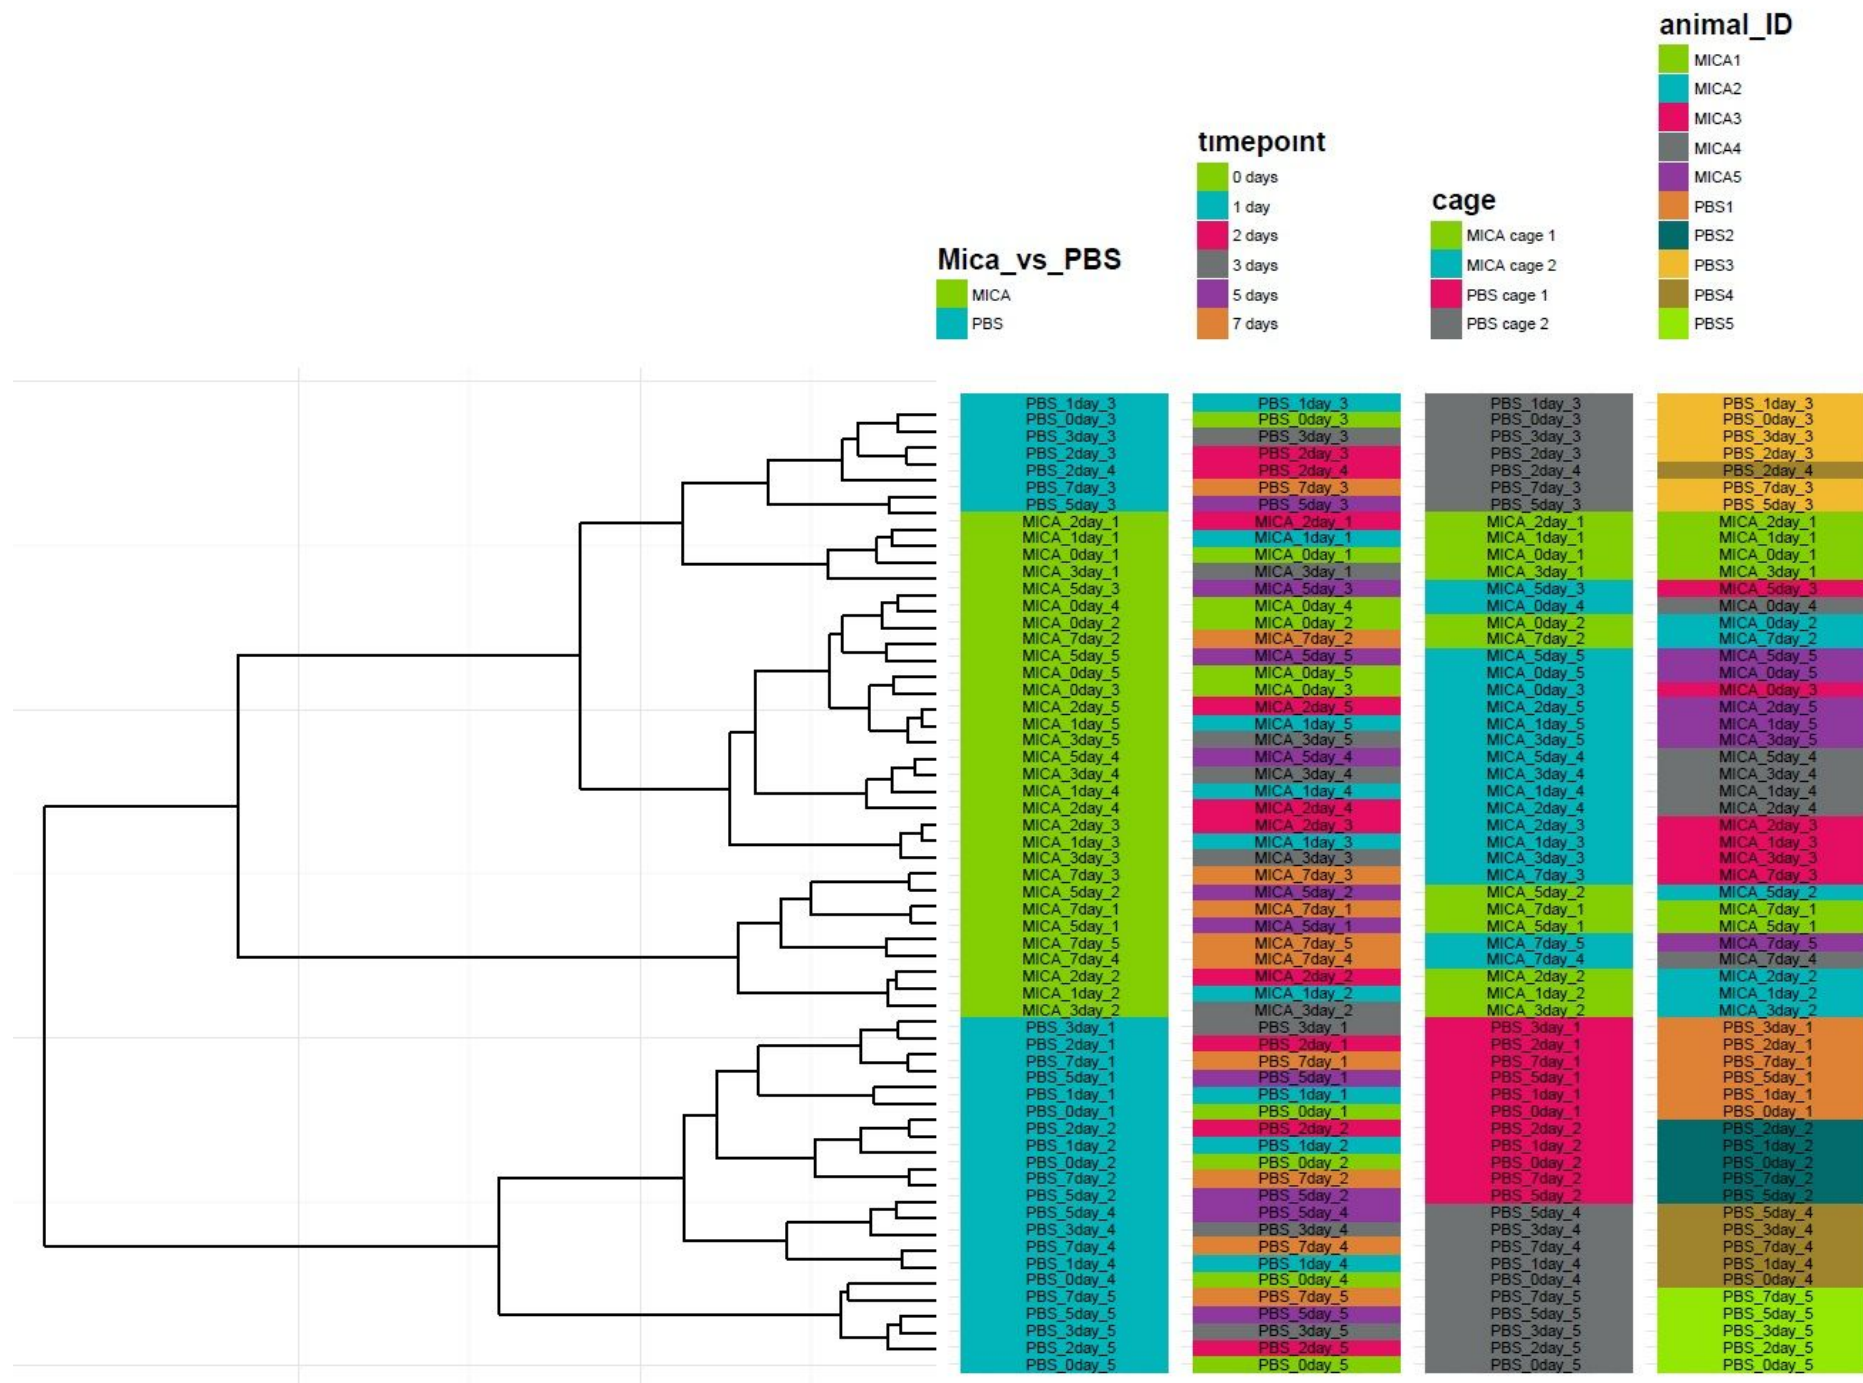

**Supplementary Figure S12**

**Hierarchical clustering of *M. aeruginosavorus*-treated samples vs. PBS control.** Dendrogram of microbiota samples extracted from feces of rats intrarectally inoculated with *M. aeruginosavorus* (MICA) vs. PBS over seven days. Dendrograms were created using the Ward 2 method. Samples clustered by treatment group, and further sub-clustered according to cage number and animal ID. Sample name format is: Treatment\_DayFecesCollected\_AnimalID.
